# Supplementary material
Source: PubMed Central journal article supplement (PMC6710116)
Supplement: NIHMS1042378-supplement-Supplemental_Material_1.pdf [file NIHMS1042378-supplement-Supplemental_Material_1.pdf]

## Supplement

### 1. Sample Information

#### Introduction

Younger and older adults were screened for eligibility (see main text) and completed a demographic and health questionnaire before they participated in the experiment. Older adults also answered questions about their subjective attention and memory abilities. All results of this assessment are presented below. Note that some of the demographic information and test results are also presented in the main text (Table 1).

#### Younger Adults (N=12)\*

##### Demographics

|                           |                                 |
|---------------------------|---------------------------------|
| Age                       | M= 24.18, SD= 2.68, Range 20-29 |
| Gender                    | 1M/ 11F                         |
| Handedness                | 12R/ 0L                         |
| Highest education         | 7 Bachelor/ 2 Master/2 College  |
| Years of formal education | M=17.00, SD=1.41, Range 14-18   |
| Occupation                | 8 university/ 2 apprenticeship  |

##### Health

|                                 |                                   |
|---------------------------------|-----------------------------------|
| Contacts/Glasses                | 7 yes/ 4 no                       |
| Prescription medication         | 3 yes/ 8 no                       |
| Non-prescription medication     | 12 no/ 0 yes                      |
| Neurological disorder or damage | 12 no/ 0 yes                      |
| Psychological disorder          | 12 no/ 0 yes                      |
| Chronic somatic disease(s)      | 12 no/ 0 yes                      |
| Physical activity               | 0 no/ 11 yes                      |
| Mental exercise                 | 1 no/ 11 yes                      |
| Smoking                         | 11 no/ 0 yes                      |
| Weekly alcohol consumption      | 4 none/ 2 one to two/ 5 > two     |
| Weekly coffee consumption       | 2 none / 2 one to five / 7 > five |
| Hours of sleep per night        | M= 7.14, SD= 0.71, Range 6-8      |

##### Vision and neuropsychological tests

|                |                                    |
|----------------|------------------------------------|
| Vision         | 12 pass/ 0 no pass                 |
| Colorblindness | 12 pass/ 0 no pass                 |
| NAART          | M= 16, SD= 4.69, Range 12-41       |
| VIQ            | M= 116.88, SD= 6.16, Range 110-128 |
| PIQ            | M= 113.82, SD= 2.91, Range 110-119 |
| FIQ            | M= 117.44, SD= 5.40, Range 111-118 |
| DSST           | M= 68, SD= 7.99, Range 55-81       |

|                        |                                 |
|------------------------|---------------------------------|
| CFQ -Total             | M= 26.00, SD=10.76, Range 13-45 |
| CFQ -Forgetfulness     | M= 11, SD= 3.72, Range 6-18     |
| CFQ -Distractability   | M= 8.82, SD=4.60, Range 4-18    |
| CFQ -False Triggering  | M= 5.7, SD= 3.65, Range 1-12    |
| CES-D (> 20 exclusion) | M= 4.73, SD= 4.80, Range 1-17   |

\* data of one younger participant of the pre-experimental assessment were not complete

## Older Adults

### Demographics

|                                    |                                                                          |
|------------------------------------|--------------------------------------------------------------------------|
| Age                                | M=72.5, SD=5.35, 66-84                                                   |
| Gender                             | 6M/ 6F                                                                   |
| Handedness                         | 10R/ 2L                                                                  |
| Highest education                  | 12 college/ 0 no college                                                 |
| Years of formal education          | M= 16.58, SD=1.98, 12-19                                                 |
| Occupation/<br>Previous Occupation | 0 manual work/2 non-manual work/<br>10 professional or intellectual work |
| Retired                            | 11 yes/ 1 no                                                             |

### Health

|                                 |                                   |
|---------------------------------|-----------------------------------|
| Contacts or glasses             | 11 yes/ 1 no                      |
| Chronic eye disease             | 0 yes/ 12 no                      |
| Learning difficulties           | 0 yes/ 12 no                      |
| Prescription medication         | 8 yes/ 4 no                       |
| Non-prescription medication     | 6 yes/ 6 no                       |
| Neurological disorder or damage | 0 yes/ 12 no                      |
| Psychological disorder          | 0 yes/ 12 no                      |
| Chronic somatic disease(s)      | 0 yes/ 12 no                      |
| Physical activity               | 10 yes/ 2 no                      |
| Mental exercise                 | 11 yes/ 1 no                      |
| Smoking                         | 1 yes/ 11 no                      |
| Weekly alcohol consumption      | 7 none /2 one to two /3 > two     |
| Weekly coffee consumption       | 1 none / 2 one to five / 8 > five |
| Hours of sleep per night        | M= 7.1, SD=1.30, Range 6-8        |
| Use of New Technologies         | 10 yes / 1 no                     |

### Vision and neuropsychological tests

|                                |                                   |
|--------------------------------|-----------------------------------|
| Vision                         | 12 pass/ 0 no pass                |
| Colorblindness                 | 12 pass/ 0 no pass                |
| MMSE (<20 exclusion)           | M= 28.92, SD= 1.31, Range 26-30   |
| NAART (total errors out of 59) | M=10, SD= 7.51, Range 2-27        |
| VIQ                            | M= 119.8, SD= 6.68, Range 104-127 |
| PIQ                            | M= 115.2, SD= 3.15, Range 108-119 |

|                        |                                     |
|------------------------|-------------------------------------|
| FIQ                    | M= 120, SD= 5.86, Range 106-126     |
| DSST                   | M= 49.25, SD= 8.34, Range 39-63     |
| CRI -Total             | M= 136.33, SD= 18.76, Range 110-171 |
| CRI -Ed                | M= 126.50, SD= 11.14, Range 109-146 |
| CRI -WorkingActivity   | M= 130.17, SD=25.91, Range 89-172   |
| CRI -LeisureTime       | M= 125.50, SD= 25.93, Range 81-171  |
| CFQ -Total             | M= 17.75, SD= 14.36, Range 0-51     |
| CFQ -Forgetfulness     | M= 12.92, SD= 9.95, Range 0-32      |
| CFQ -Distractability   | M= 6.83, SD= 4.86, Range 0-14       |
| CFQ -False Triggering  | M= 5.67, SD= 4.23, Range 0-13       |
| CES-D (> 20 exclusion) | M= 5.17, SD= 5.59, Range 0-14       |

**Subjective cognitive abilities/decline** (scale 0-10, 0=very poor/none, 10=very good/much)

|                                           |                               |
|-------------------------------------------|-------------------------------|
| Ability to pay attention                  | M= 8.83, SD= 1.03, Range 7-10 |
| Ability to concentrate                    | M= 9.20, SD= 0.92, Range 8-10 |
| Ability to remember                       | M= 8.00, SD=0.93, Range 7-10  |
| Experience of concentration decrease      | M= 1.42, SD= 1.44, Range 0-5  |
| Experience of memory decline              | M= 2.08, SD= 1.17, Range 1-5  |
| Experience of decline in paying attention | M= 1.25, SD= 0.97, Range 0-3  |
