# Supplementary material
Source: PubMed Central journal article supplement (PMC6710116)
Supplement: NIHMS1042378-supplement-Supplemental_Material_3.pdf [file NIHMS1042378-supplement-Supplemental_Material_3.pdf]

### 3. Reaction Time Distributions

#### Younger Adults

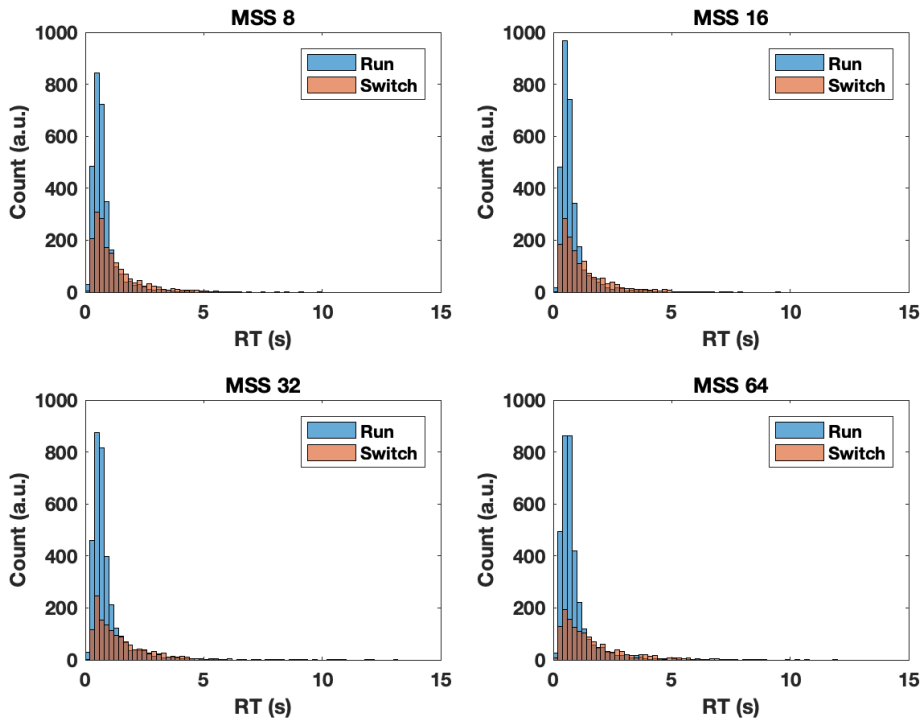

#### Older Adults

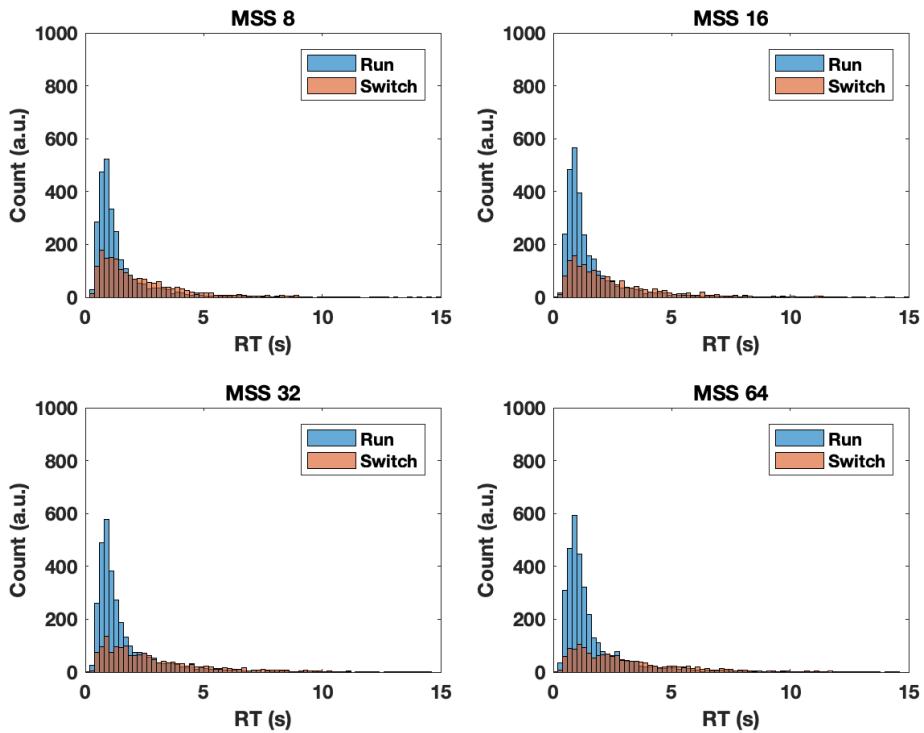

Distributions of reaction times (RT). For each of the four memory set size (MSS) conditions (8, 16, 32, 64), distributions are plotted for run and switch trials for younger adults and older adults. Histograms were computed with bin sizes of 0.2 s.

Younger Adults

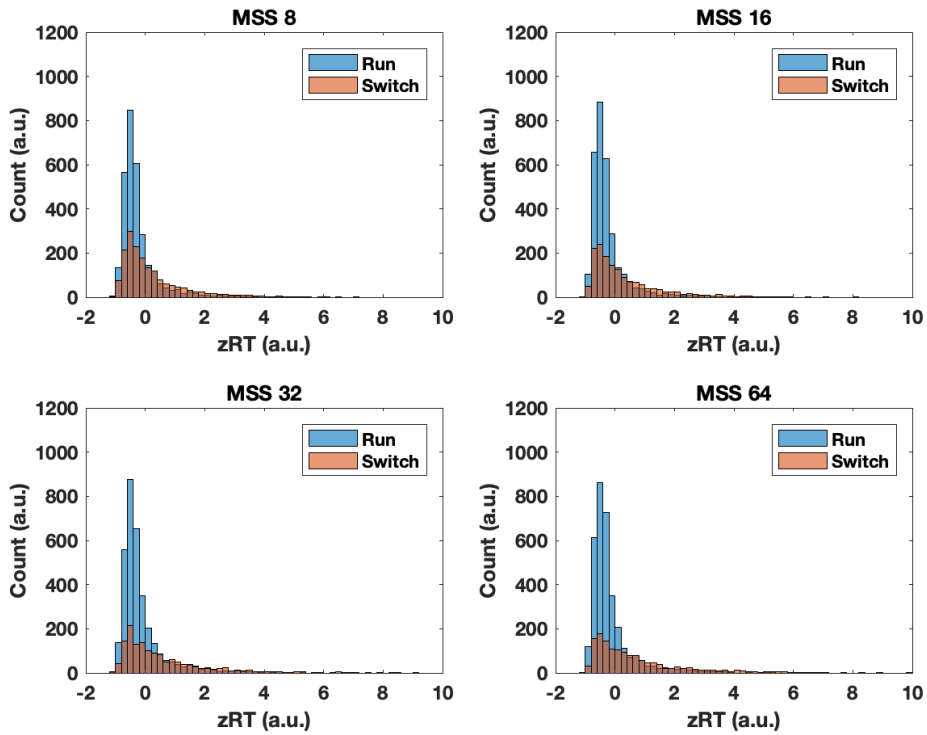

Older Adults

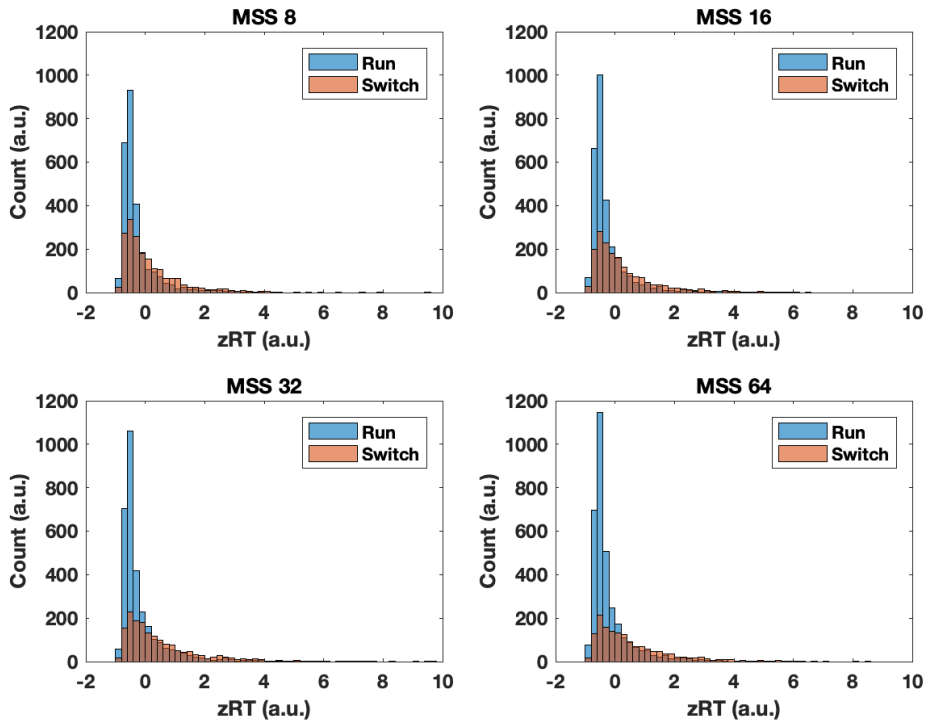

Distribution of z-transformed RT (zRT). For each of the four memory set size (MSS) conditions (8, 16, 32, 64), distributions are plotted for run and switch trials for younger adults and older adults. Histograms were computed with bin sizes of 0.2.
